# Supplementary material for: Fewer Major Amputations Among Individuals With Diabetes in Finland in 1997–2007: A population-based study
Source: PubMed Central journal article supplement — Diabetes Care. 2010 Aug 31;33(12):2598–603. doi: 10.2337/dc10-0462 (PMC2992197; doi:10.2337/dc10-0462), 2010-08-31
Supplement: supp_dc10-0462_dc100462Onlineappendix.pdf [file supp_dc10-0462_dc100462Onlineappendix.pdf]

## ONLINE APPENDIX

**Table A1.** Yearly numbers of the first major (above ankle) amputations among persons with diabetes in Finland in 1997–2007, the proportions of amputees who were men, and the percentages of below-knee amputations. Y-ITDM, insulin-treated diabetic persons below 40 years at the first registration of diabetes; O-ITDM, insulin-treated diabetic persons aged 40 years or more at the first registration of diabetes; NITDM, non-insulin-treated diabetes.

|       | Persons in group Y-ITDM |       |              | Persons in group O-ITDM |       |              | Persons with NITDM |       |              | Non-diabetic persons |       |              |
|-------|-------------------------|-------|--------------|-------------------------|-------|--------------|--------------------|-------|--------------|----------------------|-------|--------------|
|       | N                       | % men | % below knee | N                       | % men | % below knee | N                  | % men | % below knee | N                    | % men | % below knee |
| 1997  | 54                      | 66.7  | 90.7         | 48                      | 50.0  | 54.2         | 385                | 46.0  | 53.8         | 446                  | 47.1  | 34.5         |
| 1998  | 45                      | 66.7  | 77.8         | 52                      | 55.8  | 71.2         | 404                | 37.1  | 50.0         | 446                  | 46.9  | 37.0         |
| 1999  | 47                      | 63.8  | 80.9         | 63                      | 52.4  | 66.7         | 397                | 48.1  | 57.2         | 437                  | 48.1  | 36.6         |
| 2000  | 38                      | 68.4  | 84.2         | 56                      | 58.9  | 71.4         | 405                | 45.7  | 50.9         | 438                  | 49.1  | 33.6         |
| 2001  | 46                      | 69.6  | 82.6         | 59                      | 52.5  | 64.4         | 378                | 49.2  | 49.5         | 416                  | 49.0  | 38.9         |
| 2002  | 36                      | 77.8  | 86.1         | 54                      | 64.8  | 46.3         | 393                | 49.9  | 49.1         | 385                  | 45.5  | 32.5         |
| 2003  | 49                      | 61.2  | 87.8         | 33                      | 63.6  | 78.8         | 336                | 50.0  | 47.0         | 376                  | 53.2  | 32.4         |
| 2004  | 31                      | 54.8  | 71.0         | 42                      | 52.4  | 54.8         | 337                | 54.3  | 49.3         | 357                  | 43.7  | 33.6         |
| 2005  | 40                      | 80.0  | 67.5         | 41                      | 51.2  | 61.0         | 348                | 57.2  | 48.9         | 369                  | 42.8  | 30.4         |
| 2006  | 44                      | 72.7  | 86.4         | 29                      | 37.9  | 48.3         | 322                | 54.0  | 50.3         | 366                  | 41.8  | 32.2         |
| 2007  | 44                      | 77.3  | 79.5         | 22                      | 59.1  | 63.6         | 369                | 52.8  | 41.5         | 398                  | 46.0  | 33.9         |
| Total | 474                     | 69.0  | 81.9         | 499                     | 54.7  | 62.1         | 4074               | 49.2  | 49.9         | 4434                 | 46.8  | 34.3         |
